# Supplementary material
Source: publisher site journal article supplement (https://www.dovepress.com/article/256237)
Supplement: Supplementary file 1 [file get_supplementary_file.php]

# Supplemental Materials

# Statistical Appendix

Cardinality matching was used to establish comparison groups that were similar to one another in terms of patient demographics, patient clinical characteristics, and hospital/provider characteristics.1 Cardinality matching directly targets covariate balance by treating matching as an optimization problem, whereby an objective function is maximized subject to constraints: the objective function is to find the mathematically-guaranteed largest matched sample subject to researcher-specified covariate balance constraints. Cardinality matching represents an advance over propensity score methods and has been shown to outperform propensity score matching with respect to achieving better covariate balance and larger post-match sample size.2

The match was conducted with a 1 SIG:1 GST matching ratio, using a conservative covariate balance constraint requiring that between-comparison-group differences in any individual matching covariate could not exceed an absolute standardized mean difference of 0.05.3 All covariates listed in the “Measurement of covariates” section were considered for matching; comorbidities with prevalence <1.0% within the pooled sample were omitted from the match. Cardinality matching is performed using R statistical software (www.r-project.org) using the -cardmatch- function of the -designmatch- package and Gurobi Optimizer (Gurobi Optimization, LLC, Beaverton, OR).

After matching, Generalized Estimating Equations (GEE) models accounting for hospital-level clustering (a statistical phenomenon that can occur when patients within the same hospital experience similar outcomes) were used to test for statistically significant differences in outcomes between the SIG and GST groups; this conservatively adjusts the analyses to reduce the risk of erroneously finding statistically significant differences between comparison groups. The GEE models used an exchangeable working correlation matrix, robust standard errors, and appropriate link functions (log for continuous outcomes, logit for binary outcomes) and error distributions (gamma for total hospital costs and operating room time, negative binomial for length of stay, binomial for binary outcomes). A p-value of 0.05 was used as the threshold for statistical significance.

For the confirmatory analysis of the primary outcome findings in the larger, pre-matching study sample, multivariable GEE regression with a logit link and binomial error distribution was used to adjust for all variables used for matching in the primary analyses. These models accounted for hospital-level clustering as described above.

**References**

1. Zubizarreta JR, Paredes RD, Rosenbaum PR. Matching for balance, pairing for heterogeneity in an observational study of the effectiveness of for-profit and not-for-profit high schools in Chile. The Annals of Applied Statistics. 2014;8(1):204-231.
2. Visconti G, Zubizarreta JR. Handling limited overlap in observational studies with cardinality matching. Observational Studies. 2018;4:217-249.
3. Austin PC. Balance diagnostics for comparing the distribution of baseline covariates between treatment groups in propensity-score matched samples. Stat Med. 2009;28(25):3083–3107. doi:10.1002/sim.3697

**Supplemental Appendix 1. International Classification of Diseases, 10th Revision, Clinical Modification and Procedure Classification System (ICD-10-CM/ICD-10-PCS) diagnosis and procedure codes used to query the database for patient selection and measurement of outcomes**

| Measure | Code | Description |
| --- | --- | --- |
| Sleeve gastrectomy | 0DB64Z3 | Excision of Stomach, Percutaneous Endoscopic Approach, Vertical |
| Obesity | E66* | Overweight and obesity |
| Leak surrogate | K63.2 | Fistula of intestine |
|  | K65.1 | Peritoneal abscess |
|  | K91.81 | Other intraoperative complications of digestive system |
|  | K91.89 | Other postprocedural complications and disorders of digestive system |
| Body mass index | Z68* | Body mass index [BMI] |
| Bleeding | D62 | Acute posthemorrhagic anemia |
| R58 | Hemorrhage, not elsewhere classified |
| K92.2 | Gastrointestinal hemorrhage, unspecified |
| K92.1 | Melena |
| K91.840 | Postprocedural hemorrhage of a digestive system organ or structure following a digestive system procedure |
| K91.841 | Postprocedural hemorrhage of a digestive system organ or structure following other procedure |
| K91.61 | Intraoperative hemorrhage and hematoma of a digestive system organ or structure complicating a digestive system procedure |
| K91.62 | Intraoperative hemorrhage and hematoma of a digestive system organ or structure complicating other procedure |
| K91.870 | Postprocedural hematoma of a digestive system organ or structure following a digestive system procedure |
| K91.871 | Postprocedural hematoma of a digestive system organ or structure following other procedure |
| K91.872 | Postprocedural seroma of a digestive system organ or structure following a digestive system procedure |
| K91.873 | Postprocedural seroma of a digestive system organ or structure following other procedure |
| Perioperative autologous transfusion of whole blood or blood components | 30233H0 | Transfusion of Autologous Whole Blood into Peripheral Vein, Percutaneous Approach |
| 30233N0 | Transfusion of Autologous Red Blood Cells into Peripheral Vein, Percutaneous Approach |
| 30243H0 | Transfusion of Autologous Whole Blood into Central Vein, Percutaneous Approach |
| 30243N0 | Transfusion of Autologous Red Blood Cells into Central Vein, Percutaneous Approach |
| 30253H0 | Transfusion of Autologous Whole Blood into Peripheral Artery, Percutaneous Approach |
| 30253N0 | Transfusion of Autologous Red Blood Cells into Peripheral Artery, Percutaneous Approach |
| 30263H0 | Transfusion of Autologous Whole Blood into Central Artery, Percutaneous Approach |
| 30263N0 | Transfusion of Autologous Red Blood Cells into Central Artery, Percutaneous Approach |
| Exchange transfusion  Other transfusion of whole blood | 30233H1 | Transfusion of Nonautologous Whole Blood into Peripheral Vein, Percutaneous Approach |
| 30243H1 | Transfusion of Nonautologous Whole Blood into Central Vein, Percutaneous Approach |
| 30253H1 | Transfusion of Nonautologous Whole Blood into Peripheral Artery, Percutaneous Approach |
| 30263H1 | Transfusion of Nonautologous Whole Blood into Central Artery, Percutaneous Approach |
| Transfusion of previously collected autologous blood | 30233W0 | Transfusion of Autologous Factor IX into Peripheral Vein, Percutaneous Approach |
| 30243W0 | Transfusion of Autologous Factor IX into Central Vein, Percutaneous Approach |
| 30253W0 | Transfusion of Autologous Factor IX into Peripheral Artery, Percutaneous Approach |
| 30263W0 | Transfusion of Autologous Factor IX into Central Artery, Percutaneous Approach |
| Transfusion of packed cells | 30233N1 | Transfusion of Nonautologous Red Blood Cells into Peripheral Vein, Percutaneous Approach |
| 30233P1 | Transfusion of Nonautologous Frozen Red Cells into Peripheral Vein, Percutaneous Approach |
| 30243N1 | Transfusion of Nonautologous Red Blood Cells into Central Vein, Percutaneous Approach |
| 30243P1 | Transfusion of Nonautologous Frozen Red Cells into Central Vein, Percutaneous Approach |
| 30253N1 | Transfusion of Nonautologous Red Blood Cells into Peripheral Artery, Percutaneous Approach |
| 30253P1 | Transfusion of Nonautologous Frozen Red Cells into Peripheral Artery, Percutaneous Approach |
| 30263N1 | Transfusion of Nonautologous Red Blood Cells into Central Artery, Percutaneous Approach |
| 30263P1 | Transfusion of Nonautologous Frozen Red Cells into Central Artery, Percutaneous Approach |
| Transfusion of platelets | 30233R1 | Transfusion of Nonautologous Platelets into Peripheral Vein, Percutaneous Approach |
| 30243R1 | Transfusion of Nonautologous Platelets into Central Vein, Percutaneous Approach |
| 30253R1 | Transfusion of Nonautologous Platelets into Peripheral Artery, Percutaneous Approach |
| 30263R1 | Transfusion of Nonautologous Platelets into Central Artery, Percutaneous Approach |
| Transfusion of coagulation factors | 30233T1 | Transfusion of Nonautologous Fibrinogen into Peripheral Vein, Percutaneous Approach |
| 30233V1 | Transfusion of Nonautologous Antihemophilic Factors into Peripheral Vein, Percutaneous Approach |
| 30233W1 | Transfusion of Nonautologous Factor IX into Peripheral Vein, Percutaneous Approach |
| 30243T1 | Transfusion of Nonautologous Fibrinogen into Central Vein, Percutaneous Approach |
| 30243V1 | Transfusion of Nonautologous Antihemophilic Factors into Central Vein, Percutaneous Approach |
| 30243W1 | Transfusion of Nonautologous Factor IX into Central Vein, Percutaneous Approach |
| 30253T1 | Transfusion of Nonautologous Fibrinogen into Peripheral Artery, Percutaneous Approach |
| 30253V1 | Transfusion of Nonautologous Antihemophilic Factors into Peripheral Artery, Percutaneous Approach |
| 30253W1 | Transfusion of Nonautologous Factor IX into Peripheral Artery, Percutaneous Approach |
| 30263T1 | Transfusion of Nonautologous Fibrinogen into Central Artery, Percutaneous Approach |
| 30263V1 | Transfusion of Nonautologous Antihemophilic Factors into Central Artery, Percutaneous Approach |
| 30263W1 | Transfusion of Nonautologous Factor IX into Central Artery, Percutaneous Approach |
| Transfusion of other serum or serum protein | 30233J1 | Transfusion of Nonautologous Serum Albumin into Peripheral Vein, Percutaneous Approach |
| 30243J1 | Transfusion of Nonautologous Serum Albumin into Central Vein, Percutaneous Approach |
| 30253J1 | Transfusion of Nonautologous Serum Albumin into Peripheral Artery, Percutaneous Approach |
| 30263J1 | Transfusion of Nonautologous Serum Albumin into Central Artery, Percutaneous Approach |
| Transfusion of fresh/frozen plasma | 30233K1 | Transfusion of Nonautologous Frozen Plasma into Peripheral Vein, Percutaneous Approach |
| 30233L1 | Transfusion of Nonautologous Fresh Plasma into Peripheral Vein, Percutaneous Approach |
| 30243K1 | Transfusion of Nonautologous Frozen Plasma into Central Vein, Percutaneous Approach |
| 30243L1 | Transfusion of Nonautologous Fresh Plasma into Central Vein, Percutaneous Approach |
| 30253K1 | Transfusion of Nonautologous Frozen Plasma into Peripheral Artery, Percutaneous Approach |
| 30253L1 | Transfusion of Nonautologous Fresh Plasma into Peripheral Artery, Percutaneous Approach |
| 30263K1 | Transfusion of Nonautologous Frozen Plasma into Central Artery, Percutaneous Approach |
| 30263L1 | Transfusion of Nonautologous Fresh Plasma into Central Artery, Percutaneous Approach |
| Transfusion of cryoprecipitate | 30233M1 | Transfusion of Nonautologous Plasma Cryoprecipitate into Peripheral Vein, Percutaneous Approach |
| 30243M1 | Transfusion of Nonautologous Plasma Cryoprecipitate into Central Vein, Percutaneous Approach |
| 30253M1 | Transfusion of Nonautologous Plasma Cryoprecipitate into Peripheral Artery, Percutaneous Approach |
| 30263M1 | Transfusion of Nonautologous Plasma Cryoprecipitate into Central Artery, Percutaneous Approach |
| Transfusion of other substance | 30233Q1 | Transfusion of Nonautologous White Cells into Peripheral Vein, Percutaneous Approach |
| 30243Q1 | Transfusion of Nonautologous White Cells into Central Vein, Percutaneous Approach |
| 30253Q1 | Transfusion of Nonautologous White Cells into Peripheral Artery, Percutaneous Approach |
| 30263Q1 | Transfusion of Nonautologous White Cells into Central Artery, Percutaneous Approach |
| Comorbidities | Quan H, Sundararajan V, Halfon P, et al. Coding algorithms for defining comorbidities in ICD-9-CM and ICD-10 administrative data. Med Care. 2005;43:1130–1139. doi: 10.1097/01.mlr.0000182534.19832.83.  Elixhauser Comorbidity Software for ICD-10-CM (beta version) Healthcare Cost and Utilization Project (HCUP). November 2018. Agency for Healthcare Research and Quality, Rockville, MD. www.hcup-us.ahrq.gov/toolssoftware/comorbidityicd10/comorbidity_icd10.jsp. | |

*Including sub-codes
